# Supplementary material for: The Relationship between Gut Microbiota and Respiratory Tract Infections in Childhood: A Narrative Review
Source: MDPI journal article supplement (doi:10.3390/nu14142992), 2022-07-21
Supplement: s1 [file s1]

## **Methods**

A literature search in PubMed performed using the words (microbiome or gut microbiome or microbiota or gut-lung axis) and (respiratory tract infection\* or lower respiratory tract infection\* or recurrent respiratory infection\*) and (child or children or childhood), returned 475 results. After studying the titles and abstracts, 13 pertinent papers were selected, and their full text was obtained. After the exclusion of reviews and papers on different target populations, seven studies remained.
