# Supplementary material
Source: MDPI journal article supplement (https://www.mdpi.com/2072-6643/14/14/2992)
Supplement: s1 [file s1]

Archive with 1 entries (1 files):
- nutrients-1800245-supplementary.pdf
